# Supplementary material for: Asymmetric Synthesis and Absolute Configuration Assignment of a New Type of Bedaquiline Analogue
Source: MDPI journal article supplement (doi:10.3390/molecules201219846), 2015-12-11
Supplement: s1 [file s1]

# Asymmetric Synthesis and Absolute Configuration Assignment of a New Type of Bedaquiline Analogue

Chang-Jiang Qiao, Xiao-Kui Wang, Fei Xie, Wu Zhong and Song Li

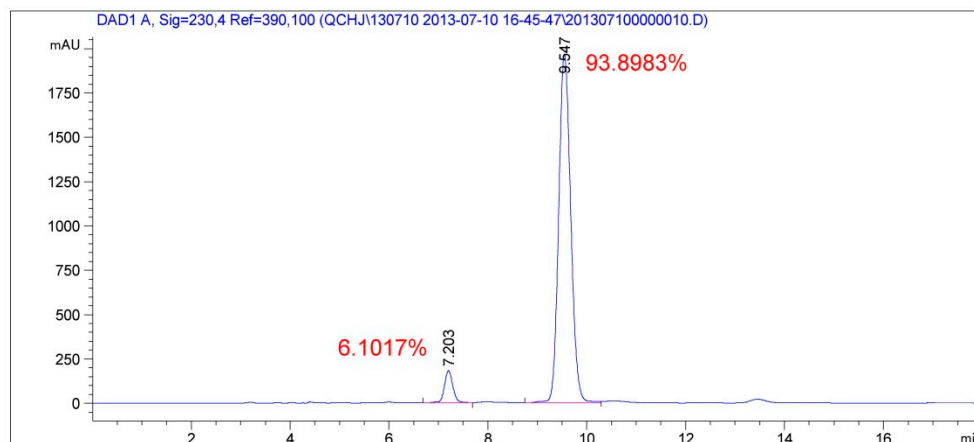

**Figure S1.** HPLC spectrum of **9a**, Chiralpak IC (250 mm × 4.6 mm, 5 μ), IPA/hexane = 30%:70%, flow = 1.0 mL, T = 20 °C, λ = 225 nm.

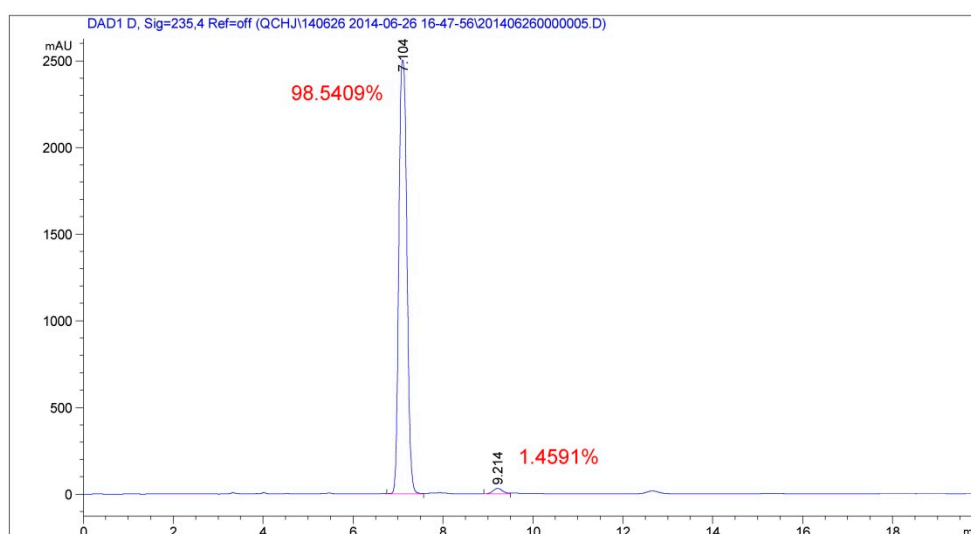

**Figure S2.** HPLC spectrum of **9b**, Chiralpak IC (250 mm × 4.6 mm, 5 μ), IPA/hexane = 30%:70%, flow = 1.0 mL, T = 20 °C, λ = 225 nm.

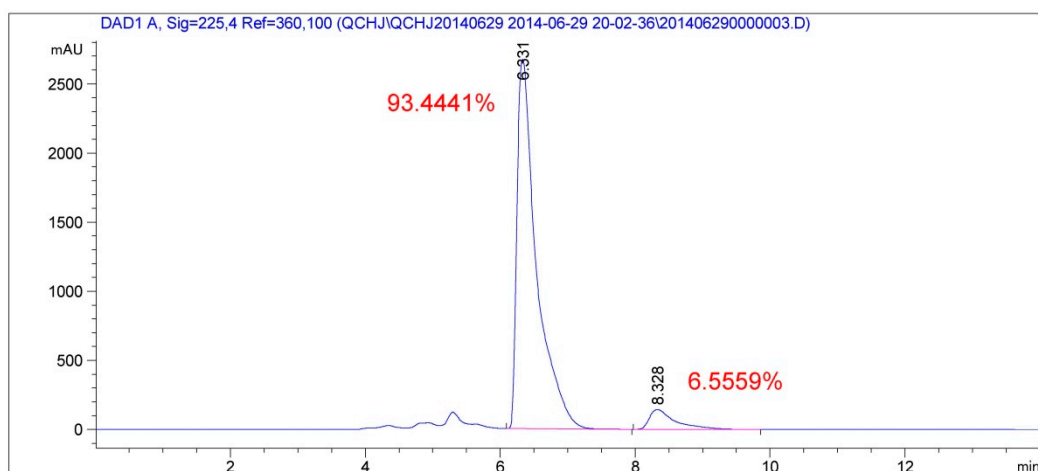

**Figure S3.** HPLC spectrum of **TM-05-a**, Astec® CYCLOBOND® I 2000 RSP (250 mm × 4.6 mm, 5 μ), MeOH:(50 μM CH<sub>3</sub>COONH<sub>4</sub> aqueous solution) = 80%:20%, flow = 0.8 mL, T = 20 °C, λ = 225 nm.

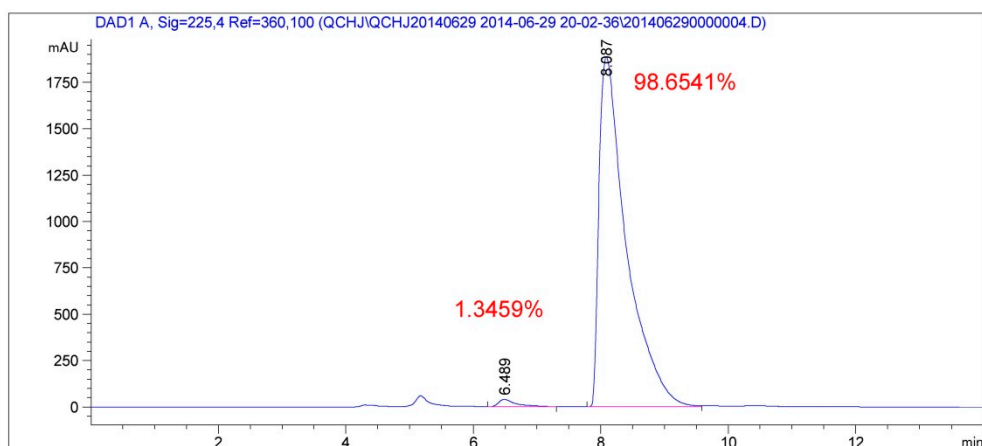

**Figure S4.** HPLC spectrum of **TM-05-c**, Astec® CYCLOBOND® I 2000 RSP (250 × 4.6 mm, 5 μ), MeOH:(50 μM CH<sub>3</sub>COONH<sub>4</sub> aqueous solution) = 80%:20%, flow = 0.8 mL, T = 20 °C, λ = 225 nm.

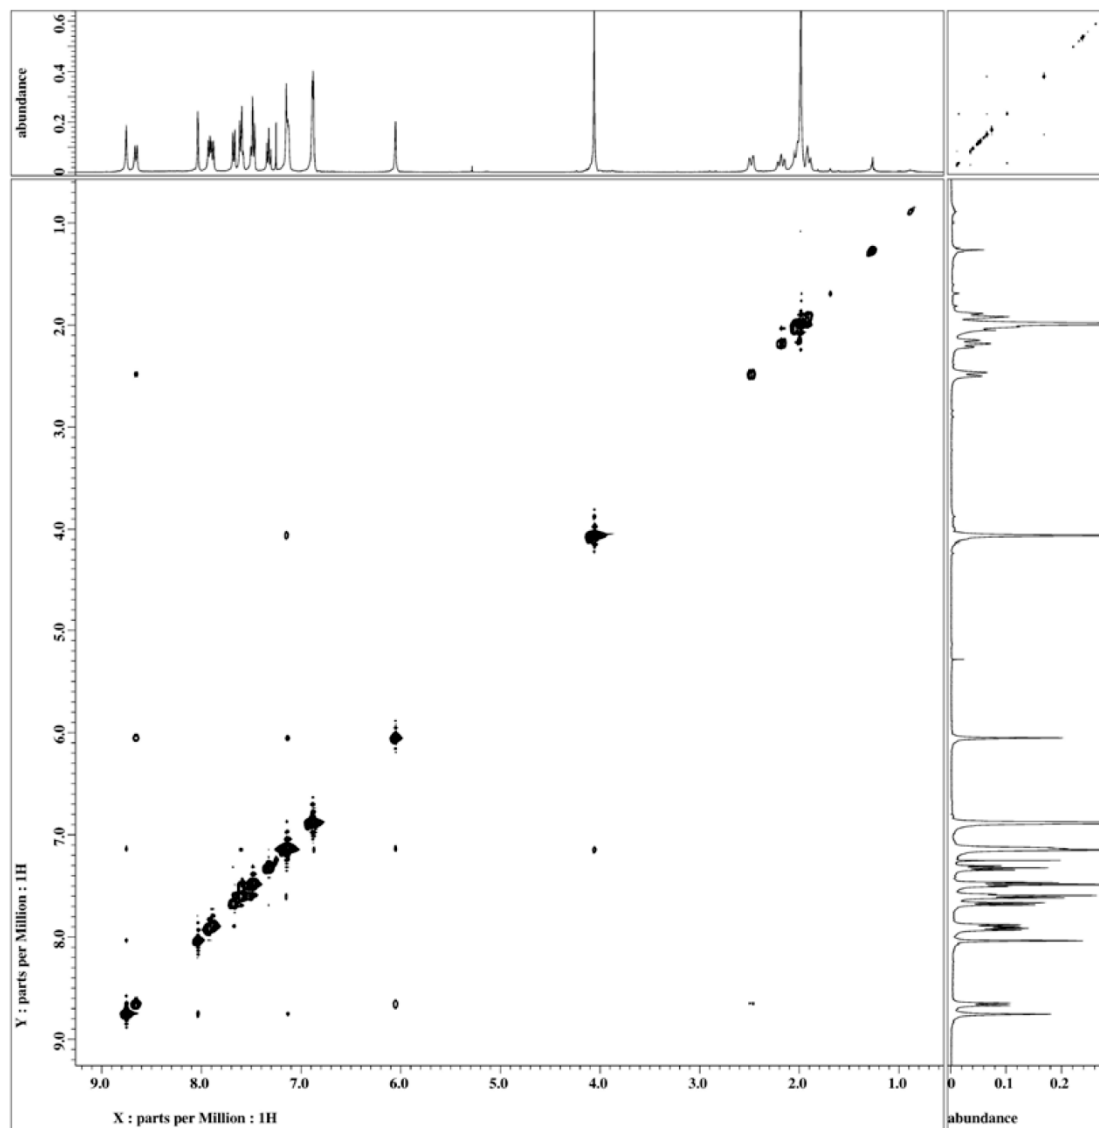

Figure S5. 2D NOESY spectrum of **TM-05-c** in  $\text{CDCl}_3$ .

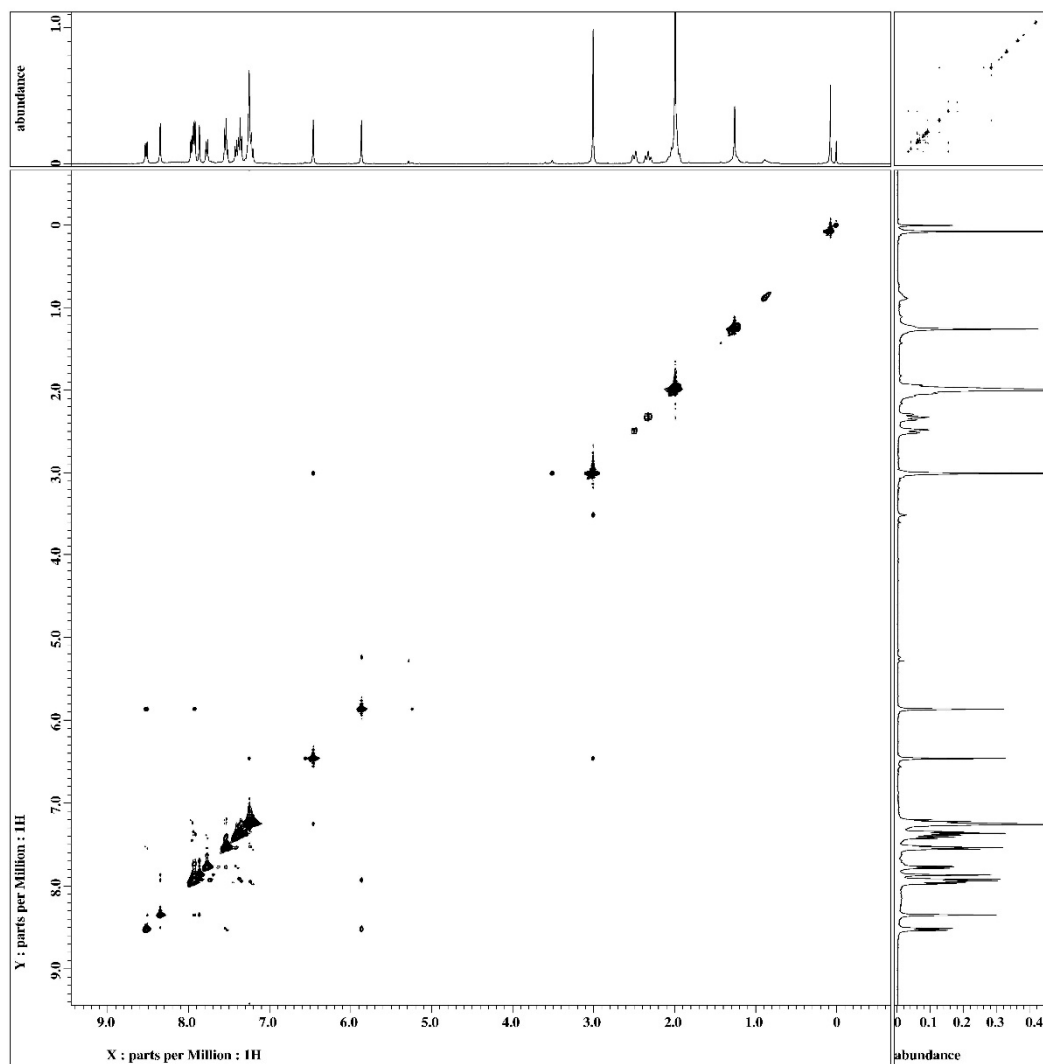

**Figure S6.** 2D ROESY spectrum of **TM-05-d** in  $\text{CDCl}_3$

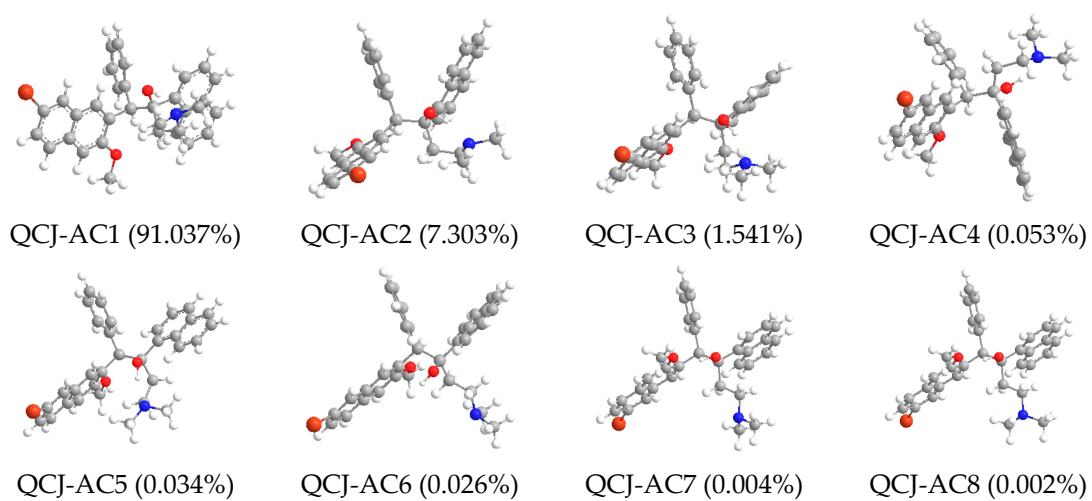

**Figure S7.** Computer searched eight conformers of (1*R*, 2*S*) isomer of **TM-05**.

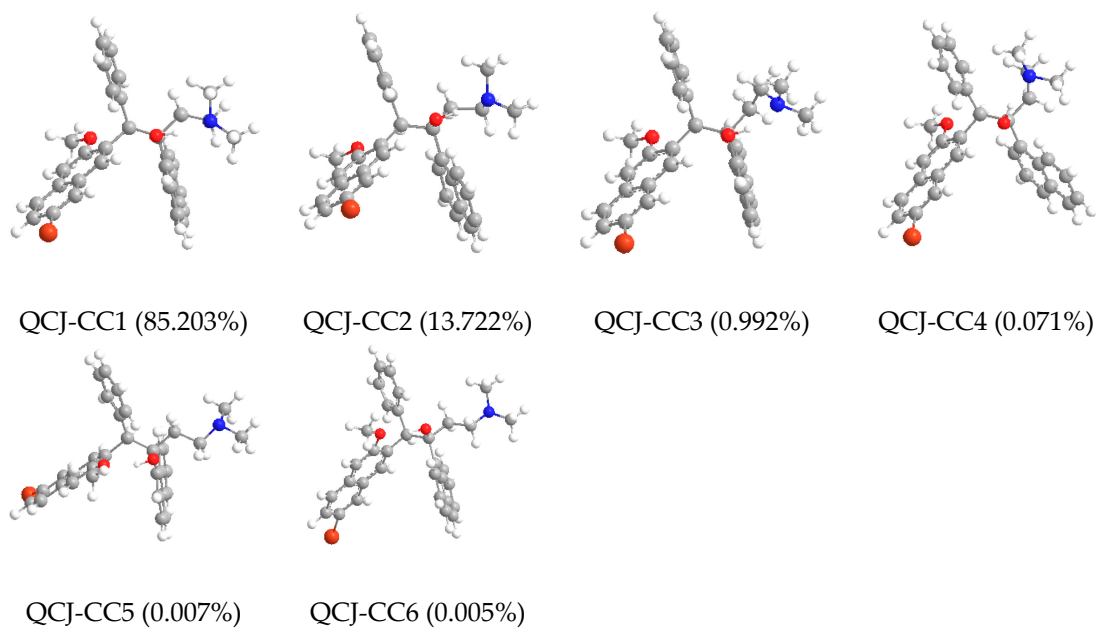

**Figure S8.** Computer searched six conformers of (1*R*, 2*R*) isomer of **TM-05**.

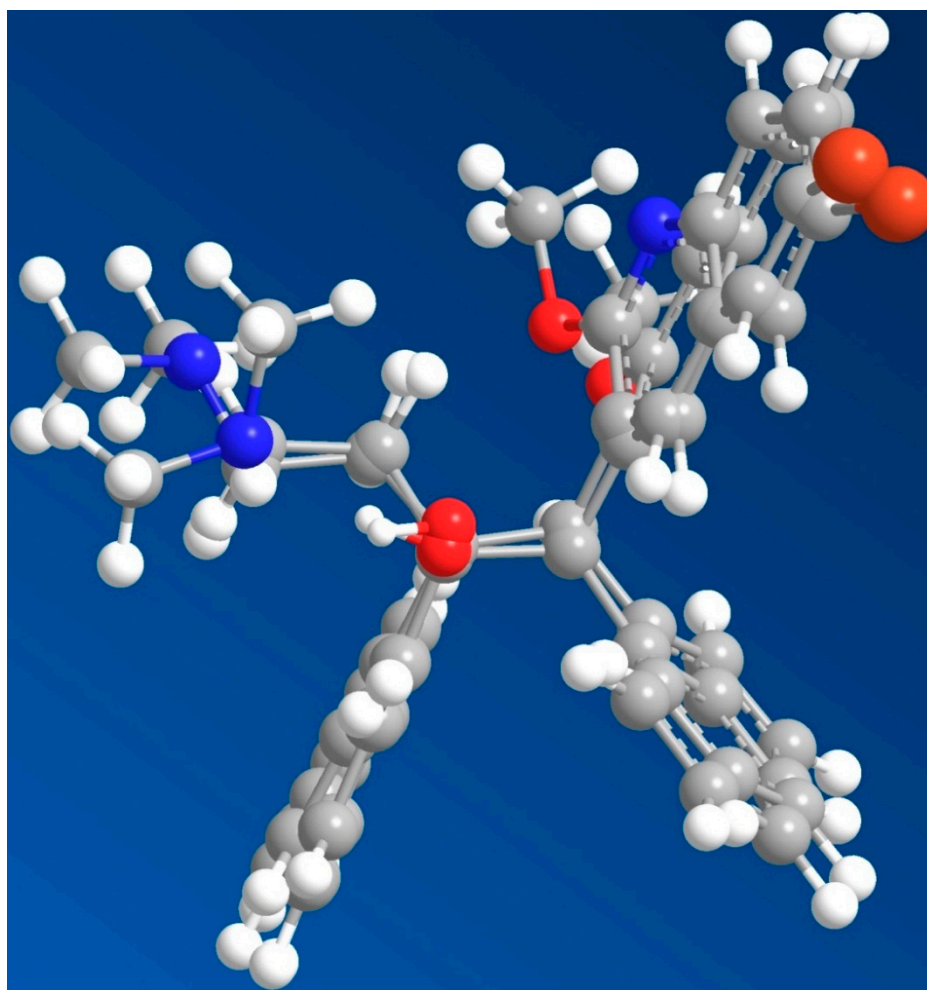

**Figure S9.** The overlay results between crystal structure of bedaquiline from PDB database (ID: 4V1F) and optimized conformer of (1*R*, 2*S*) isomer of **TM-05**. Fast overlay was performed on Chem3D Ultra 10.0 and the optimized conformer of (1*R*, 2*S*) isomer used was QCJ-AC1 from the calculated result in Figure S7.

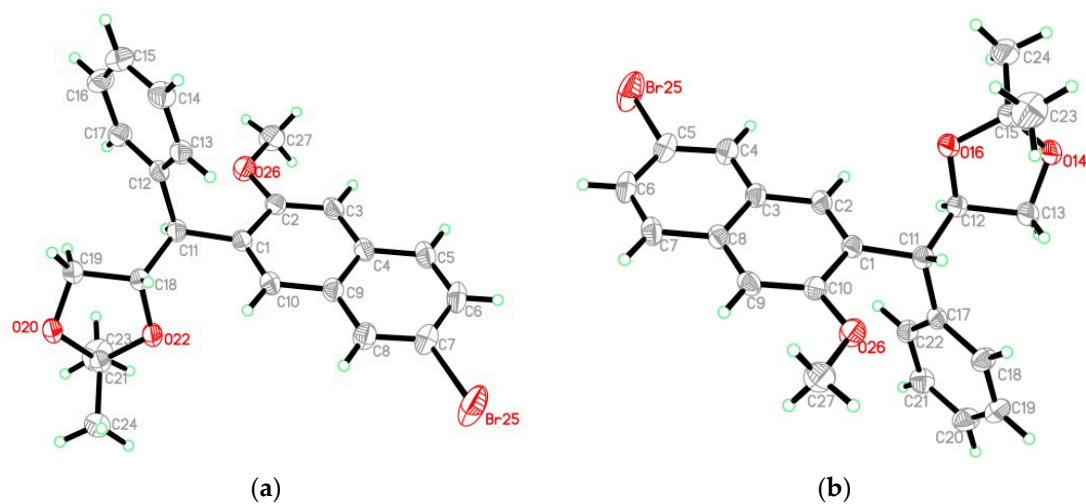

**Figure S10.** Crystal structures of the two stereoisomers of compound 10. (a) An ORTEP plot of (2*R*, 3*R*) stereoisomer of compound 10; (b) An ORTEP plot of (2*S*, 3*S*) stereoisomer of compound 10.
